# Supplementary material for: Longitudinal Study to Assess the Quantitative Use of Fundus Autofluorescence for Monitoring Disease Progression in Choroideremia
Source: PubMed Central journal article supplement (PMC7826764; doi:10.3390/jcm10020232), 2021-01-11
Supplement: jcm-10-00232-s001.pdf [file jcm-10-00232-s001.pdf]

**Supplementary Table 1**

|      | Latest visual acuity |       | Baseline age (y) | Follow-up age (y) | Follow-up interval (months) | Baseline FAF area (mm <sup>2</sup> ) |       | Follow-up FAF area (mm <sup>2</sup> ) |       | RAE (mm <sup>2</sup> /y) |       | Mutation status and type                |
|------|----------------------|-------|------------------|-------------------|-----------------------------|--------------------------------------|-------|---------------------------------------|-------|--------------------------|-------|-----------------------------------------|
|      | OD                   | OS    |                  |                   |                             | OD                                   | OS    | OD                                    | OS    | OD                       | OS    |                                         |
| 1    | 0.18                 | 0.18  | 38               | 41                | 30                          | 4.27                                 | 6.76  | 2.91                                  | 5.07  | 0.54                     | 0.67  | c.529delG p.E1777KfsX Deletion          |
| 2    | 2.7                  | 1.78  | 48               | 50                | 31                          | 0.2                                  | 0.33  | 0.1                                   | 0.17  | 0.04                     | 0.06  | Deletion of exon 10-11                  |
| 3*   | 0.48                 | 0.3   | 47               | 49                | 22                          | 1.13                                 | 1.6   | 1.01                                  | 1.6   | 0.07                     | 0.00  | Deletion of exon 13-15.                 |
| 4    | 0.18                 | 0.6   | 50               | 55                | 54                          | 2.67                                 | 2.53  | 2.03                                  | 1.62  | 0.14                     | 0.20  | c.535_538delGAAA p.E179Tfs Deletion     |
| 5b   | 2.3                  | 0.78  | 29               | 32                | 38                          | NA                                   | 0.81  | NA                                    | 0.67  | NA                       | 0.04  | Deletion of exon 1                      |
| 6    | -0.08                | -0.08 | 33               | 42                | 104                         | 17.6                                 | 9.58  | 9.85                                  | 4.8   | 0.89                     | 0.55  | c.649_652delTACT p.Y217HfsX Deletion    |
| 7    | 2.3                  | 1.3   | 52               | 54                | 27                          | 4.56                                 | 5.08  | 3.76                                  | 4.79  | 0.35                     | 0.13  | c.649_652delTACT p.Y217HfsX Deletion    |
| 8    | 0.48                 | 0.18  | 26               | 30                | 41                          | 17.3                                 | 15.31 | 12.2                                  | 10.93 | 1.48                     | 1.27  | REP1 deletion                           |
| 9*   | 0                    | 0     | 23               | 26                | 36                          | 16.08                                | 11.81 | 11.97                                 | 8.15  | 1.38                     | 1.23  | c.1245_1246delins14 p.K415NfsX Deletion |
| 10   | 0.18                 | 0     | 17               | 19                | 25                          | 20.26                                | 21.76 | 15.73                                 | 16.85 | 2.21                     | 2.40  | Deletion of exons 1-11                  |
| 11   | 0.78                 | 0.3   | 56               | 58                | 25                          | 11.18                                | 13.61 | 8.98                                  | 9.62  | 1.07                     | 1.93  | c.1584_1587delTGTT p.P529Hfs Deletion   |
| 12   | 0.6                  | 0.3   | 60               | 68                | 88                          | 14.84                                | 26.21 | 6.94                                  | 12.05 | 1.08                     | 1.93  | Deletion of exon 10-15                  |
| 13ab | 0.1                  | 0     | 18               | 20                | 25                          | 54.01                                | 48.12 | 42.69                                 | 41.15 | 5.43                     | 3.35  | REP1 deletion                           |
| 14   | 0.18                 | 0.18  | 54               | 55                | 12                          | 22.42                                | 43.21 | 20.96                                 | 39.06 | 1.44                     | 4.15  | c.737_741delTAATC p.L246Qfs Deletion    |
| 15   | 0.18                 | 0.18  | 23               | 27                | 48                          | 12.24                                | 11.09 | 8.27                                  | 7.09  | 0.99                     | 1.00  | Deletion of exon 12-13                  |
| 16b  | 0.18                 | 0.18  | 62               | 66                | 49                          | 8.26                                 | 7.76  | 6.21                                  | 5.18  | 0.50                     | 0.63  | c.652_655delTCAC p.S218Kfs Deletion     |
| 17   | 0.1                  | 0.2   | 19               | 20                | 7                           | 59.89                                | 53.74 | 54.37                                 | 48.18 | 9.46                     | 9.53  | c.1079delA p.N360TfsX Deletion          |
| 18   | 0                    | 0.48  | 49               | 52                | 36                          | 27.28                                | 20.14 | 21.96                                 | 13.91 | 1.77                     | 2.08  | Deletion of exon 3-15                   |
| 19b  | 0.3                  | 0.18  | 20               | 21                | 12                          | 8.44                                 | 9.11  | 7.31                                  | 7.7   | 1.14                     | 1.42  | Deletion of exon 5-8                    |
| 20*  | 0.2                  | 0.2   | 16               | 18                | 17                          | 18.55                                | 17.45 | 15.03                                 | 14.4  | 2.49                     | 2.16  | Deletion of exon 3                      |
| 21*  | 0.14                 | 0.16  | 10               | 11                | 6                           | 30.68                                | 27.24 | 27.3                                  | 19.74 | 6.76                     | 15.00 | Deletion of exon 2-7                    |
| 22   | 0.3                  | 1.9   | 47               | 49                | 28                          | 0.41                                 | 0.57  | 0.31                                  | 0.48  | 0.04                     | 0.04  | c.1300_1303delGTGG p.V434Rfs Deletion   |
| 23   | 1                    | 0.3   | 64               | 67                | 29                          | 0.19                                 | 0.09  | 0.16                                  | 0.05  | 0.01                     | 0.02  | c.525_526delAG p.E177Kfs Deletion       |
| 24   | 0.6                  | 1     | 51               | 52                | 18                          | 2.29                                 | 2.05  | 1.58                                  | 1.51  | 0.47                     | 0.36  | c.1079delA p.N360Tfs Deletion           |
| 25   | 0.3                  | 0.3   | 29               | 32                | 34                          | 7.04                                 | 7.91  | 4.72                                  | 7.05  | 0.83                     | 0.31  | Deletion exon 9                         |
| 26   | 0.6                  | 0     | 20               | 22                | 15                          | 1.29                                 | 2.34  | 1.11                                  | 1.98  | 0.14                     | 0.29  | c.525_526delAG p.E177Kfs Deletion       |
| 27   | 0.18                 | 0.48  | 28               | 30                | 30                          | 7.91                                 | NA    | 6.33                                  | 5.07  | 0.64                     | NA    | Deletion exon 3-4                       |
| 28   | 0                    | 0     | 19               | 22                | 33                          | 27.95                                | 27.37 | 24.49                                 | 21.88 | 1.27                     | 2.02  | c.492_493delGA p.N165Cfs Deletion       |

|     |       |       |    |    |    |       |       |       |       |       |       |                                        |
|-----|-------|-------|----|----|----|-------|-------|-------|-------|-------|-------|----------------------------------------|
| 29  | 0     | 0.78  | 17 | 18 | 14 | 22.5  | 22.38 | 20.88 | 21.54 | 1.37  | 0.71  | c.492_493delGA p.N165Cfs Deletion      |
| 30  | 0.18  | 0.18  | 31 | 34 | 34 | 1.26  | 0.84  | 0.92  | 0.53  | 0.12  | 0.11  | Deletion exon 9                        |
| 31  | 0     | 0     | 42 | 44 | 24 | 26.57 | 30.1  | 26.4  | 28.49 | 0.09  | 0.81  | c.1762_1765delGTCA p.V588Nfs Deletion  |
| 32  | 0     | 1.48  | 37 | 41 | 49 | 3.51  | 0.67  | 2.78  | 0.47  | 0.18  | 0.05  | Deletion of exon 10-15                 |
| 33  | 0     | 0     | 21 | 22 | 6  | 18.4  | 27.59 | 17.54 | 25.96 | 1.67  | 3.26  | c.886delA p.M296Kfs Deletion           |
| 34  | 0     | 0     | 34 | 37 | 31 | 9.91  | 9.9   | 9.53  | NA    | 0.15  | NA    | c492_493delGA p.N165Cfs Deletion       |
| 35  | 0     | 0.3   | 28 | 29 | 10 | 15.1  | 16.34 | 13.51 | 14.23 | 1.89  | 2.51  | Deletion of exon 1-15                  |
| 36b | 0     | 0.18  | 49 | 50 | 18 | 3.22  | 4.1   | 2.47  | 3.49  | 0.50  | 0.41  | c.872_880del p.E291Vfs, Deletion       |
| 37  | 0.1   | 0.48  | 53 | 54 | 12 | 3.37  | 2.12  | 2.51  | 1.67  | 0.83  | 0.44  | c.652_655delTCAC p.S218Kfs Deletion    |
| 38  | 0.1   | 0.3   | 32 | 34 | 13 | 17.82 | 20.87 | 17.35 | 16.09 | 0.42  | 4.31  | Deletion of exon 1-15                  |
| 39  | -0.08 | -0.08 | 21 | 22 | 12 | 76.96 | 78.09 | 53.29 | 52.14 | 22.92 | 25.13 | c.179delA p.K60Rfs Deletion            |
| 40a | 0.78  | 0.6   | 56 | 58 | 29 | 8.68  | 19.72 | 7.19  | 18.11 | 0.62  | 0.67  | REP1 deletion                          |
| 41a | 0     | -0.08 | 59 | 60 | 6  | 6.38  | 12.08 | 6.06  | 11.79 | 0.64  | 0.58  | REP1 deletion                          |
| 42a | 0.6   | 0     | 20 | 22 | 15 | 1.29  | 2.34  | 1.11  | 1.98  | 0.14  | 0.29  | REP1 deletion                          |
| 43  | 0.48  | 0.48  | 56 | 57 | 9  | 3.24  | 10.25 | 3.12  | 9.85  | 0.16  | 0.53  | c.1335dupA p.R446Tfs, Duplication      |
| 44* | 2.7   | 0.78  | 47 | 52 | 63 | NA    | 1.43  | NA    | 0.41  | NA    | 0.19  | c.495dupT p.N165Cfs, Duplication       |
| 45  | NA    | NA    | 41 | 42 | 10 | 9.33  | 14.1  | 8.25  | 13.68 | 1.34  | 0.52  | Duplication of exons 1-2 and 9-12      |
| 46  | 0     | 0     | 12 | 14 | 25 | 29.69 | 35.52 | 24.01 | 24.34 | 2.73  | 5.37  | c.931GinsA, p.Y312lfs, Insertion       |
| 47  | 0.1   | 0     | 25 | 26 | 9  | 17.14 | 13.3  | 15.95 | 12.66 | 1.56  | 0.84  | c.1099_1100insTACC p.R367Lfs Insertion |
| 48  | NA    | NA    | 68 | 70 | 12 | 4.38  | 0.41  | 3.66  | 0.34  | 0.70  | 0.07  | c.1520A>G p.H507R Missense             |
| 49  | 0.6   | 1     | 42 | 46 | 39 | 0.6   | 0.41  | 0.5   | 0.33  | 0.03  | 0.02  | c.715C>T p.R239X Nonsense              |
| 50  | 0.18  | 0.18  | 52 | 58 | 74 | 12.98 | 13.06 | 10.18 | 10.05 | 0.46  | 0.49  | c.715C>T p.R239X, Nonsense             |
| 51  | 0     | -0.08 | 22 | 24 | 26 | 3.67  | 5     | 2.72  | 3.52  | 0.44  | 0.68  | c.126C>G p.Tyr42X, Nonsense            |
| 52  | -0.08 | -0.08 | 35 | 38 | 41 | 10.14 | 14.31 | 7.89  | 11.66 | 0.66  | 0.78  | c.1264C>T p.Q422X, Nonsense            |
| 53  | 0.18  | -0.08 | 37 | 40 | 24 | 23.29 | 37.31 | 19.98 | 31.98 | 1.63  | 2.63  | c.877C>T p.R293X, Nonsense             |
| 54  | 2.3   | 2.7   | 48 | 51 | 34 | 1.56  | 1.46  | 0.95  | 1.07  | 0.21  | 0.14  | c.877C>T p.R293X, Nonsense             |
| 55  | 0.78  | 0.3   | 56 | 60 | 47 | 41.48 | 20.43 | 31.47 | 15.33 | 2.56  | 1.30  | c.715C>T p.R239X, Nonsense             |
| 56  | 0.18  | 0.18  | 38 | 43 | 51 | 13.6  | 20.96 | 7.62  | 16.7  | 1.41  | 1.00  | c.715C>T p.R239X, Nonsense             |
| 57  | 0     | 0.18  | 25 | 25 | 6  | NA    | 8.93  | 3.84  | 7.49  | NA    | 3.14  | c.757C>T p.R253X, Nonsense             |
| 58  | 0.3   | 0.18  | 69 | 70 | 8  | 1.7   | NA    | 1.69  | 4.38  | 0.02  | NA    | c.757C>T p.R253X, Nonsense             |
| 59  | 0.6   | 0.18  | 41 | 43 | 16 | 1.7   | 1.51  | 1.16  | 0.83  | 0.42  | 0.52  | c.877C>T p.R293X, Nonsense             |
| 60  | 0.1   | 0.18  | 22 | 23 | 12 | 56.15 | 55.37 | 36.08 | 29.94 | 20.18 | 25.57 | c.715C>T p.R239X, Nonsense             |

|      |       |       |    |    |    |       |       |       |       |       |      |                                               |
|------|-------|-------|----|----|----|-------|-------|-------|-------|-------|------|-----------------------------------------------|
| 61   | 0.78  | 0.48  | 51 | 53 | 23 | 0.35  | 0.83  | 0.25  | 0.81  | 0.05  | 0.01 | c.799C>T p.R267X, Nonsense                    |
| 62   | 0.18  | 0.3   | 44 | 46 | 24 | 3.44  | 2.59  | 3.13  | 2.32  | 0.16  | 0.14 | c.877C>T p.R293X, Nonsense                    |
| 63   | NA    | NA    | 57 | 58 | 18 | 5.33  | 12.37 | 4.14  | 11.27 | 0.79  | 0.73 | c.877C>T p.R293X, Nonsense                    |
| 64   | 0     | 0     | 42 | 42 | 11 | 2.9   | 3.58  | 2.53  | 3.3   | 0.40  | 0.31 | c.877C>T p.R293X, Nonsense                    |
| 65   | 0     | 0.18  | 42 | 43 | 8  | 1.66  | 11.53 | 1.5   | 10.16 | 0.23  | 1.99 | c.130G>T p.G44X, Nonsense                     |
| 66   | 0.18  | 0.18  | 37 | 38 | 20 | 5.27  | 11.09 | 5.19  | NA    | 0.05  | NA   | c.799C>T p.R267X, Nonsense                    |
| 67   | 0.78  | 1     | 45 | 46 | 12 | 0.6   | 0.46  | 0.54  | 0.4   | 0.06  | 0.06 | c.655C>T p.Q219X, Nonsense                    |
| 68   | 0.1   | 0.1   | 26 | 27 | 7  | 14.71 | 19.92 | 14.17 | 19.61 | 0.93  | 0.53 | c.808C>T p.R270X, Nonsense                    |
| 69   | 0     | 0     | 24 | 24 | 7  | 48.17 | 32.96 | 39.86 | 30.05 | 14.25 | 4.99 | c.808C>T p.R270X, Nonsense                    |
| 70   | -0.08 | -0.08 | 41 | 43 | 24 | 13.32 | 10.58 | 10.93 | 8.88  | 1.19  | 0.85 | c.940+3delA (intron 7), Splice site           |
| 71   | 0     | 0.18  | 43 | 47 | 53 | 4.42  | 6.02  | 2.39  | 3.91  | 0.46  | 0.48 | c.189+1 G>C (intron 3), Splice site           |
| 72b* | 2.7   | 0.48  | 51 | 53 | 24 | 0.95  | 1.31  | 0.56  | 1.17  | 0.20  | 0.07 | c.49+3delA (intron 1), Splice site            |
| 73*  | 0     | 0     | 27 | 31 | 46 | 8.99  | 6.03  | 6.19  | 3.37  | 0.74  | 0.70 | c.941-2GT>AG (intron 7), Splice site          |
| 74   | -0.08 | -0.08 | 27 | 33 | 82 | 45.56 | 34.96 | 27.1  | 19.28 | 2.71  | 2.30 | c.1245-1G>A (intron 9), Splice site           |
| 75   | 0.18  | 0.18  | 23 | 30 | 82 | 21.47 | 23.43 | 12.83 | 15.29 | 1.27  | 1.20 | c.1245-1G>A (intron 9), Splice site           |
| 76   | 0.18  | 0.3   | 21 | 25 | 46 | 62.13 | 85.43 | 58.95 | 67.82 | 0.83  | 4.59 | c.49+3_49+10delinsGCTT (intron 1) Splice site |
| 77   | 0.18  | 0.48  | 48 | 51 | 38 | 16.69 | 13.75 | 14.02 | 11.42 | 0.84  | 0.74 | c.116+1G>A (intron 2), Splice site            |
| 78   | 0     | 0     | 41 | 43 | 25 | 5.79  | 6.15  | 4.07  | 5.16  | 0.84  | 0.48 | c.49+2dupT (intron 1), Splice site            |
| 79   | 0.18  | 0.18  | 56 | 59 | 36 | 8.42  | 9.44  | 8.24  | NA    | 0.06  | NA   | c.819+1G>T (intron 6), Splice site            |
| 80   | 0.48  | NA    | 63 | 66 | 34 | 0.54  | NA    | 0.39  | NA    | 0.05  | NA   | c.940+2T>C (intron 7), Splice site            |

Table S1. Summary of clinical findings and molecular status of 80 CHM patients. \* Denotes 7 novel mutations not previously listed in HGMD. <sup>a</sup>REP1 deletion confirmed using western blot analysis. <sup>b</sup>Highlights patients of Asian background. The following sets of patients are siblings (6/7), (28/29), (49/50), (68/69), (74/75).
